# Supplementary material for: Spatio-temporal Analysis of the Genetic Diversity of Arctic Rabies Viruses and Their Reservoir Hosts in Greenland
Source: PubMed Central journal article supplement (PMC4961414; doi:10.1371/journal.pntd.0004779), 2016-07-26
Supplement: pntd.0004779.s001.pdf [file pntd.0004779.s001.pdf]

**Supplemental Table S 1:** Overview of raw sequence data using NGS generated in this study.

| Sample name for this study | Reads      | Virus reads | Virus (%) | Mitochondrial Arctic fox reads | Arctic fox mitochondrion (%) |
|----------------------------|------------|-------------|-----------|--------------------------------|------------------------------|
| Gra21.05-GRL-1-AF-2005     | 2,261,322  | 8,116       | 0.359     | 9,145                          | 0.40                         |
| Gra07.06-GRL-1-AF-2006     | 3,175,864  | 4,451       | 0.140     | 4,080                          | 0.13                         |
| Gra14.06-GRL-1-AF-2006     | 3,070,940  | 1,742       | 0.057     | 5,034                          | 0.16                         |
| Gra03.13-GRL-1-AF-2013     | 1,135,200  | 26,553      | 2.339     | 12,181                         | 1.07                         |
| Gra23.06-GRL-2-AF-2006     | 4,375,340  | 6,120       | 0.140     | 4,689                          | 0.11                         |
| Gra03.10-GRL-2-AF-2010     | 3,014,708  | 6,298       | 0.209     | 18,968                         | 0.63                         |
| Gra01.13-GRL-2-AF-2013     | 15,665,420 | 161,907     | 1.034     | 420,692                        | 2.69                         |
| Gra02.13-GRL-2-AF-2013     | 2,086,986  | 31,788      | 1.523     | 16,580                         | 0.79                         |
| Gra03.06-GRL-3-AF-2006     | 3,152,834  | 4,017       | 0.127     | 14,504                         | 0.46                         |
| Gra04.06-GRL-3-AF-2006     | 3,671,700  | 3,353       | 0.091     | 14,724                         | 0.40                         |
| Gra05.06-GRL-3-AF-2006     | 5,093,346  | 5,548       | 0.109     | 7,431                          | 0.15                         |
| Gra08.06-GRL-3-AF-2006     | 4,786,360  | 10,937      | 0.229     | 12,329                         | 0.26                         |
| Gra09.06-GRL-3-AF-2006     | 3,249,052  | 1,650       | 0.051     | 37,730                         | 1.16                         |
| Gra10.06-GRL-3-AF-2006     | 3,315,214  | 7,961       | 0.240     | 15,335                         | 0.46                         |
| Gra24.06-GRL-3-D-2006      | 2,514,468  | 12,843      | 0.511     | -                              | -                            |
| Gra25.06-GRL-3-AF-2006     | 4,678,954  | 6,647       | 0.142     | 26,146                         | 0.56                         |
| Gra02.07-GRL-3-AF-2007     | 4,306,408  | 1,271       | 0.030     | 25,190                         | 0.58                         |
| Gra01.14-GRL-3-AF-2014     | 558,922    | 6,376       | 1.141     | 4,115                          | 0.74                         |
| Gra16.06-GRL-4-AF-2006     | 2,984,986  | 4,391       | 0.147     | 5,017                          | 0.17                         |
| Gra09.07-GRL-4-AF-2007     | 3,756,534  | 8,024       | 0.214     | 18,392                         | 0.49                         |
| Gra10.07-GRL-4-AF-2007     | 2,373,734  | 6,003       | 0.253     | 14,557                         | 0.61                         |
| Gra02.14-GRL-4-AF-2014     | 659,242    | 18,238      | 2.767     | 8,380                          | 1.27                         |
| Gra03.14-GRL-4-AF-2014     | 252,966    | 7,833       | 3.096     | 5,137                          | 2.03                         |
| Gra02.10-GRL-5-AF-2010     | 990,010    | 1,874       | 0.189     | 10,234                         | 1.03                         |
| Gra05.10-GRL-5-AF-2010     | 3,525,344  | 3,449       | 0.098     | 21,169                         | 0.60                         |

|                        |           |        |       |        |      |
|------------------------|-----------|--------|-------|--------|------|
| Gra10.08-GRL-6-AF-2008 | 2,813,148 | 9,285  | 0.330 | 26,224 | 0.93 |
| Gra07.09-GRL-6-AF-2009 | 1,849,544 | 7,893  | 0.427 | 13,411 | 0.73 |
| Gra13.09-GRL-6-AF-2009 | 1,767,008 | 6,464  | 0.366 | 8,756  | 0.50 |
| Gra06.10-GRL-6-AF-2010 | 4,017,164 | 1,300  | 0.032 | 14,909 | 0.37 |
| Gra07.10-GRL-6-AF-2010 | 782,204   | 1,731  | 0.221 | 5,872  | 0.75 |
| Gra18.05-GRL-7-AF-2005 | 6,127,458 | 4,907  | 0.080 | 23,915 | 0.39 |
| Gra01.06-GRL-7-AF-2006 | 2,847,640 | 9,704  | 0.341 | 11,128 | 0.39 |
| Gra02.06-GRL-7-AF-2006 | 1,820,960 | 6,083  | 0.334 | 3,774  | 0.21 |
| Gra06.06-GRL-7-C-2006  | 2,235,074 | 2,075  | 0.093 | -      | -    |
| Gra20.06-GRL-7-AF-2006 | 584,502   | 352    | 0.060 | 446    | 0.08 |
| Gra21.06-GRL-7-AF-2006 | 9,149,950 | 841    | 0.009 | 43,490 | 0.48 |
| Gra26.06-GRL-7-AF-2006 | 356,468   | 138    | 0.039 | 635    | 0.18 |
| Gra04.07-GRL-7-AF-2007 | 4,803,878 | 27,032 | 0.563 | 41,071 | 0.85 |
| Gra05.07-GRL-7-AF-2007 | 2,611,946 | 1,668  | 0.064 | 26,106 | 1.00 |
| Gra15.07-GRL-7-S-2007  | 4,345,878 | 27,895 | 0.642 | -      | -    |
| Gra3a.07-GRL-7-AF-2007 | 3,834,316 | 4,778  | 0.125 | 18,062 | 0.47 |
| Gra3b.07-GRL-7-AF-2007 | 3,436,546 | 2,076  | 0.060 | 18,834 | 0.55 |
| Gra02.08-GRL-7-AF-2008 | 2,784,906 | 724    | 0.026 | 4,597  | 0.17 |
| Gra03.08-GRL-7-AF-2008 | 2,278,708 | 2,302  | 0.101 | 22,591 | 0.99 |
| Gra13.08-GRL-7-AF-2008 | 3,435,630 | 13,751 | 0.400 | 25,182 | 0.73 |
| Gra01.09-GRL-7-S-2009  | 4,996,346 | 4,558  | 0.091 | -      | -    |
| Gra02.09-GRL-7-S-2009  | 2,603,664 | 7,220  | 0.277 | -      | -    |
| Gra03.09-GRL-7-AF-2009 | 2,750,960 | 620    | 0.023 | 2,273  | 0.08 |
| Gra04.09-GRL-7-AF-2009 | 2,917,080 | 1,055  | 0.036 | 24,280 | 0.83 |
| Gra01.10-GRL-7-AF-2010 | 2,953,802 | 2,331  | 0.079 | 13,201 | 0.45 |
| Gra01.11-GRL-7-AF-2011 | 4,915,266 | 8,072  | 0.164 | -      | -    |
| 13232-CAN-NT-AF-1977   | 1,129,456 | 8,467  | 0.750 | 10,078 | 0.89 |

|                      |           |        |       |        |      |
|----------------------|-----------|--------|-------|--------|------|
| RV1391-GRL-1-F-1990  | 6,378,046 | 15,921 | 0.250 | -      | -    |
| RV1415-GRL-4-F-2001  | 1,952,228 | 1,248  | 0.064 | -      | -    |
| RV1416-GRL-5-AF-2002 | 4,012,672 | 60,932 | 1.518 | 21,314 | 0.53 |
| RV1417-GRL-3-AF-2002 | 4,429,870 | 77,781 | 1.756 | 4,702  | 0.11 |
| RV1418-GRL-4-AF-2002 | 4,044,772 | 51,947 | 1.284 | 14,161 | 0.35 |
| RV1419-GRL-3-AF-2002 | 4,845,248 | 23,611 | 0.487 | 4,418  | 0.09 |
| RV1420-GRL-4-AF-2002 | 7,331,438 | 30,013 | 0.409 | 3,327  | 0,05 |
