# Supplementary material for: Spatio-temporal Analysis of the Genetic Diversity of Arctic Rabies Viruses and Their Reservoir Hosts in Greenland
Source: PubMed Central journal article supplement (PMC4961414; doi:10.1371/journal.pntd.0004779), 2016-07-26
Supplement: pntd.0004779.s002.pdf [file pntd.0004779.s002.pdf]

**Supplemental Table S 1:** Reference sequences used in supplement Figure 1.

| Name                           | Accession | Year | Country   | Host         | Region        | Sequence length | Reference |
|--------------------------------|-----------|------|-----------|--------------|---------------|-----------------|-----------|
| AY352462 RVHK Russia 1998      | AY352462  | 1998 | Russia    | Homo sapiens | Krasnoyarsk   | 1414            | [60]      |
| AY352486 3510w Russia 1995     | AY352486  | 1995 | Russia    | Wolf         | Yakutia       | 1414            | [60]      |
| AY352488 743a Russia 1988      | AY352488  | 1988 | Russia    | Arctic fox   | Yakutia       | 1414            | [60]      |
| AY352498 4795 USA 1988         | AY352498  | 1988 | USA       | Dog          | Alaska        | 1414            | [60]      |
| AY352499 1420 USA              | AY352499  | -    | USA       | Red fox      | Alaska        | 1414            | [60]      |
| AY352500 1421 USA 1988         | AY352500  | 1988 | USA       | Red fox      | Alaska        | 1414            | [60]      |
| AY352501 1422 USA              | AY352501  | -    | USA       | Arctic fox   | Alaska        | 1414            | [60]      |
| AY352514 RV294 Russia 1990     | AY352514  | 1990 | Russia    | Arctic fox   | Yakutia       | 405             | [60]      |
| DQ010123 RV53 USA              | DQ010123  | -    | USA       | Fox          | Maine         | 400             | [16]      |
| DQ010124RV163 Canada 1989      | DQ010124  | 1989 | Canada    | Arctic fox   | -             | 400             | [16]      |
| DQ010125 RV255 Russia 1988     | DQ010125  | 1988 | Russia    | Arctic fox   | Yakutia       | 400             | [16]      |
| DQ010126 RV441 Belarus         | DQ010126  | -    | Belarus   | Fox          | -             | 400             | [16]      |
| DQ010127 RV443 Russia 1990     | DQ010127  | 1990 | Russia    | Horse        | Yakutia       | 400             | [16]      |
| DQ010129 RV1336 Russia 2002    | DQ010129  | 2002 | Russia    | Arctic fox   | Yakutia       | 400             | [16]      |
| DQ010131 RV1338 Russia 2002    | DQ010131  | 2002 | Russia    | Arctic fox   | Yakutia       | 400             | [16]      |
| DQ010132 RV1391 Greenland 1990 | DQ010132  | 1990 | Greenland | Arctic fox   | Thule         | 400             | [16]      |
| DQ010136 RV1396 Greenland 1991 | DQ010136  | 1991 | Greenland | Arctic fox   | Sisimiut      | 400             | [16]      |
| DQ010141 RV1407 Greenland 1994 | DQ010141  | 1994 | Greenland | Arctic fox   | Upernavik     | 400             | [16]      |
| DQ010143 RV1413 Greenland 1997 | DQ010143  | 1997 | Greenland | Arctic fox   | Gronnedal     | 400             | [16]      |
| DQ010147 RV1419 Greenland 2002 | DQ010147  | 2002 | Greenland | Arctic fox   | Ilulissat     | 400             | [16]      |
| DQ010148 RV1420 Greenland 2002 | DQ010148  | 2002 | Greenland | Arctic fox   | Kangerlussuaq | 400             | [16]      |
| EF611831 SG22 Russia 1987      | EF611831  | 1987 | Russia    | Arctic fox   | Yakutia       | 1350            | [17]      |
| EF611833 SG23 Russia 1988      | EF611833  | 1988 | Russia    | Arctic fox   | Yakutia       | 1350            | [17]      |
| EF611842 A6086 USA 2006        | EF611842  | 2006 | USA       | Red fox      | Alaska        | 1350            | [17]      |
| EF611843 A7027 USA 2007        | EF611843  | 2007 | USA       | Red fox      | Alaska        | 1350            | [17]      |
| EF611844 A7006 USA 2007        | EF611844  | 2007 | USA       | Dog          | Alaska        | 1350            | [17]      |

|                                 |          |      |        |            |                       |      |      |
|---------------------------------|----------|------|--------|------------|-----------------------|------|------|
| EF611845 A7033 USA 2007         | EF611845 | 2007 | USA    | Red fox    | Alaska                | 1350 | [17] |
| EF611849 A6091 USA 2006         | EF611849 | 2006 | USA    | Red fox    | Alaska                | 1350 | [17] |
| EF611850 A7032 USA 2007         | EF611850 | 2007 | USA    | Red fox    | Alaska                | 1350 | [17] |
| EF611851 A7031 USA 2006         | EF611851 | 2006 | USA    | Arctic fox | Alaska                | 1350 | [17] |
| EF611852 A7026 USA 2006         | EF611852 | 2006 | USA    | Arctic fox | Alaska                | 1350 | [17] |
| EF611853 A0905 USA 2006         | EF611853 | 2006 | USA    | Dog        | Alaska                | 1350 | [17] |
| EF611854 A0904 USA 2006         | EF611854 | 2006 | USA    | Red fox    | Alaska                | 1350 | [17] |
| EF611855 A0903 USA 2006         | EF611855 | 2006 | USA    | Dog        | Alaska                | 1350 | [17] |
| EF611856 A0906 USA 2006         | EF611856 | 2006 | USA    | Arctic fox | Alaska                | 1350 | [17] |
| JN258416 90V819AL USA 1990      | JN258416 | 1990 | USA    | Arctic fox | Alaska                | 500  | [18] |
| JN258417 90V820AL USA 1990      | JN258417 | 1990 | USA    | Red fox    | Alaska                | 500  | [18] |
| JN258418 90V821AL USA 1990      | JN258418 | 1990 | USA    | Wolf       | Alaska                | 500  | [18] |
| JN258419 90V822AL USA 1990      | JN258419 | 1990 | USA    | Red fox    | Alaska                | 500  | [18] |
| JN258420 89V804AL USA 1989      | JN258420 | 1989 | USA    | Red fox    | Alaska                | 500  | [18] |
| JN258421 89V803AL USA 1989      | JN258421 | 1989 | USA    | Red fox    | Alaska                | 500  | [18] |
| JN258422 89V812AL USA 1989      | JN258422 | 1989 | USA    | Red fox    | Alaska                | 500  | [18] |
| JN258423 89V813AL USA 1989      | JN258423 | 1989 | USA    | Red fox    | Alaska                | 500  | [18] |
| JN258424 90V815AL USA 1990      | JN258424 | 1990 | USA    | Red fox    | Alaska                | 500  | [18] |
| JN258425 90V816AL USA 1990      | JN258425 | 1990 | USA    | Arctic fox | Alaska                | 500  | [18] |
| JN258426 90V818AL USA 1990      | JN258426 | 1990 | USA    | Arctic fox | Alaska                | 500  | [18] |
| JN258427 89V805AL USA 1989      | JN258427 | 1989 | USA    | Dog        | Alaska                | 500  | [18] |
| JN258428 89V806AL USA 1989      | JN258428 | 1989 | USA    | Red fox    | Alaska                | 500  | [18] |
| JN258429 89V807AL USA 1989      | JN258429 | 1989 | USA    | Wolf       | Alaska                | 500  | [18] |
| JN258430 89V808AL USA 1989      | JN258430 | 1989 | USA    | Red fox    | Alaska                | 500  | [18] |
| JN258431 89V809AL USA 1989      | JN258431 | 1989 | USA    | Arctic fox | Alaska                | 500  | [18] |
| JN258432 89V810AL USA 1989      | JN258432 | 1989 | USA    | Dog        | Alaska                | 500  | [18] |
| JN258433 89V811AL USA 1989      | JN258433 | 1989 | USA    | Red fox    | Alaska                | 500  | [18] |
| JN258434 90L3187CAN Canada 1990 | JN258434 | 1990 | Canada | Arctic fox | Northwest Territories | 500  | [18] |
| JN258435 90L3310CAN Canada 1990 | JN258435 | 1990 | Canada | Arctic fox | Northwest Territories | 500  | [18] |

|                                 |          |      |        |            |                       |     |      |
|---------------------------------|----------|------|--------|------------|-----------------------|-----|------|
| JN258436 91L0250CAN Canada 1991 | JN258436 | 1991 | Canada | Red fox    | Northwest Territories | 500 | [18] |
| JN258437 93L0459CAN Canada 1993 | JN258437 | 1993 | Canada | Arctic fox | Northwest Territories | 500 | [18] |
| JN258438 93L0669CAN Canada 1993 | JN258438 | 1993 | Canada | Arctic fox | Northwest Territories | 500 | [18] |
| JN258439 93L2863CAN Canada 1993 | JN258439 | 1993 | Canada | Arctic fox | Northwest Territories | 500 | [18] |
| JN258440 95L1947CAN Canada 1995 | JN258440 | 1995 | Canada | Fox        | Northwest Territories | 500 | [18] |
| JN258441 97L1793CAN Canada 1997 | JN258441 | 1997 | Canada | Arctic fox | Northwest Territories | 500 | [18] |
| JN258442 05L0110CAN Canada 2005 | JN258442 | 2005 | Canada | Red fox    | Nunavut               | 500 | [18] |
| JN258443 05N6048CAN Canada 2005 | JN258443 | 2005 | Canada | Red fox    | Manitoba              | 500 | [18] |
| JN258444 02N0897CAN Canada 2002 | JN258444 | 2002 | Canada | Arctic fox | Nunavut               | 500 | [18] |
| JN258445 06L0122CAN Canada 2006 | JN258445 | 2006 | Canada | Red fox    | Northwest Territories | 500 | [18] |
| JN258446 05L0250CAN Canada 2005 | JN258446 | 2005 | Canada | Dog        | Northwest Territories | 500 | [18] |
| JN258447 05L0111CAN Canada 2005 | JN258447 | 2005 | Canada | Arctic fox | Nunavut               | 500 | [18] |
| JN258448 07L1475CAN Canada 2007 | JN258448 | 2007 | Canada | Arctic fox | Nunavut               | 500 | [18] |
| JN258449 08L1328CAN Canada 2008 | JN258449 | 2008 | Canada | Red fox    | Nunavut               | 500 | [18] |
| JN258450 08L0047CAN Canada 2008 | JN258450 | 2008 | Canada | Arctic fox | Nunavut               | 500 | [18] |
| JN258451 02L0035CAN Canada 2002 | JN258451 | 2002 | Canada | Red fox    | Nunavut               | 500 | [18] |
| JN258452 06L0213CAN Canada 2006 | JN258452 | 2006 | Canada | Arctic fox | Nunavut               | 500 | [18] |
| JN258453 99L0142CAN Canada 1999 | JN258453 | 1999 | Canada | Arctic fox | Nunavut               | 500 | [18] |
| JN258454 99L2159CAN Canada 1999 | JN258454 | 1999 | Canada | Arctic fox | Nunavut               | 500 | [18] |
| JN258455 07L0005CAN Canada 2007 | JN258455 | 2007 | Canada | Arctic fox | Northwest Territories | 500 | [18] |
| JN258456 91L0085CAN Canada 1991 | JN258456 | 1991 | Canada | Arctic fox | Northwest Territories | 500 | [18] |
| JN258457 92L0195CAN Canada 1992 | JN258457 | 1992 | Canada | Fox        | Northwest Territories | 500 | [18] |
| JN258458 92L0084CAN Canada 1992 | JN258458 | 1992 | Canada | Fox        | Northwest Territories | 500 | [18] |
| JN258459 93L0286CAN Canada 1993 | JN258459 | 1993 | Canada | Arctic fox | Northwest Territories | 500 | [18] |
| JN258460 91L0252CAN Canada 1991 | JN258460 | 1991 | Canada | Arctic fox | Northwest Territories | 500 | [18] |
| JN258461 92L0228CAN Canada 1992 | JN258461 | 1992 | Canada | Arctic fox | Northwest Territories | 500 | [18] |
| JN258462 90L3225CAN Canada 1990 | JN258462 | 1990 | Canada | Arctic fox | Northwest Territories | 500 | [18] |
| JN258463 91L0165CAN Canada 1991 | JN258463 | 1991 | Canada | Arctic fox | Northwest Territories | 500 | [18] |
| JN258464 93L2980CAN Canada 1993 | JN258464 | 1993 | Canada | Arctic fox | Northwest Territories | 500 | [18] |

|                                  |          |      |        |            |                       |     |      |
|----------------------------------|----------|------|--------|------------|-----------------------|-----|------|
| JN258465 93N2764CAN Canada 1993  | JN258465 | 1993 | Canada | Arctic fox | Québec                | 500 | [18] |
| JN258466 08L1453CAN Canada 2008  | JN258466 | 2008 | Canada | Arctic fox | Northwest Territories | 500 | [18] |
| JN258467 93N0782CAN Canada 1993  | JN258467 | 1993 | Canada | Arctic fox | Northwest Territories | 500 | [18] |
| JN258468 94N3803CAN Canada 1994  | JN258468 | 1994 | Canada | Arctic fox | Northwest Territories | 500 | [18] |
| JN258469 04L1518CAN Canada 2004  | JN258469 | 2004 | Canada | Arctic fox | Nunavut               | 500 | [18] |
| JN258470 07N0248CAN Canada 2007  | JN258470 | 2007 | Canada | Arctic fox | Nunavut               | 500 | [18] |
| JN258471 98L1893CAN Canada 1998  | JN258471 | 1998 | Canada | Arctic fox | Northwest Territories | 500 | [18] |
| JN258472 98L2209CAN Canada 1998  | JN258472 | 1998 | Canada | Arctic fox | Northwest Territories | 500 | [18] |
| JN258473 95N1082CAN Canada 1995  | JN258473 | 1995 | Canada | Arctic fox | Ontario               | 500 | [18] |
| JN258474 99N0549CAN Canada 1999  | JN258474 | 1999 | Canada | Arctic fox | Québec                | 500 | [18] |
| JN258475 07L0298CAN Canada 2007  | JN258475 | 2007 | Canada | Arctic fox | Nunavut               | 500 | [18] |
| JN258476 97L0270CAN Canada 1997  | JN258476 | 1997 | Canada | Red fox    | Northwest Territories | 500 | [18] |
| JN258477 92L0491CAN Canada 1992  | JN258477 | 1992 | Canada | Arctic fox | Northwest Territories | 500 | [18] |
| JN258478 06N5386CAN Canada 2006  | JN258478 | 2006 | Canada | Red fox    | Nunavut               | 500 | [18] |
| JN258479 01N12568CAN Canada 2001 | JN258479 | 2001 | Canada | Arctic fox | Northwest Territories | 500 | [18] |
| JN258480 91N5406CAN Canada 1991  | JN258480 | 1991 | Canada | Wolf       | Ontario               | 500 | [18] |
| JN258481 93N0398CAN Canada 1993  | JN258481 | 1993 | Canada | Arctic fox | Northwest Territories | 500 | [18] |
| JN258482 96N1804CAN Canada 1996  | JN258482 | 1996 | Canada | Arctic fox | Québec                | 500 | [18] |
| JN258483 96N1855CAN Canada 1996  | JN258483 | 1996 | Canada | Red fox    | Newfoundland          | 500 | [18] |
| JN258484 96N2026CAN Canada 1996  | JN258484 | 1996 | Canada | Red fox    | Newfoundland          | 500 | [18] |
| JN258485 96N2393CAN Canada 1996  | JN258485 | 1996 | Canada | Red fox    | Newfoundland          | 500 | [18] |
| JN258486 96N2397CAN Canada 1996  | JN258486 | 1996 | Canada | Otter      | Québec                | 500 | [18] |
| JN258487 02N2909CAN Canada 2002  | JN258487 | 2002 | Canada | Red fox    | Newfoundland          | 500 | [18] |
| JN258488 02N3548CAN Canada 2002  | JN258488 | 2002 | Canada | Red fox    | Newfoundland          | 500 | [18] |
| JN258489 03N3362CAN Canada 2003  | JN258489 | 2003 | Canada | Red fox    | Newfoundland          | 500 | [18] |
| JN258490 00L0417CAN Canada 2000  | JN258490 | 2000 | Canada | Red fox    | Northwest Territories | 500 | [18] |
| JN258491 00L0528CAN Canada 2000  | JN258491 | 2000 | Canada | Red fox    | Northwest Territories | 500 | [18] |
| JN258492 00N1512CAN Canada 2000  | JN258492 | 2000 | Canada | Red fox    | Ontario               | 500 | [18] |
| JN258493 00N2483CAN Canada 2000  | JN258493 | 2000 | Canada | Dog        | Québec                | 500 | [18] |

|                                   |          |      |           |         |                       |     |      |
|-----------------------------------|----------|------|-----------|---------|-----------------------|-----|------|
| JN258494 00N3420CAN Canada 2000   | JN258494 | 2000 | Canada    | Dog     | Québec                | 500 | [18] |
| JN258495 01N1650CAN Canada 2001   | JN258495 | 2001 | Canada    | Red fox | Newfoundland          | 500 | [18] |
| JN258496 01N3447CAN Canada 2001   | JN258496 | 2001 | Canada    | Red fox | Québec                | 500 | [18] |
| JN258497 00L0408CAN Canada 2000   | JN258497 | 2000 | Canada    | Red fox | Ontario               | 500 | [18] |
| JN258498 03N4056CAN Canada 2003   | JN258498 | 2003 | Canada    | Red fox | Newfoundland          | 500 | [18] |
| JN258499 09N0671CAN Canada 2009   | JN258499 | 2009 | Canada    | Red fox | Québec                | 500 | [18] |
| JN258500 90L0043CAN Canada 1990   | JN258500 | 1990 | Canada    | Bear    | Northwest Territories | 500 | [18] |
| JN258501 90V865GRN Greenland 1990 | JN258501 | 1990 | Greenland | -       | -                     | 500 | [18] |
| JN258502 91V867GRN Greenland 1991 | JN258502 | 1991 | Greenland | Fox     | Scoresbysund          | 500 | [18] |
| JN258503 92V868GRN Greenland 1992 | JN258503 | 1992 | Greenland | Fox     | Moriussiaq            | 500 | [18] |
| JN258504 92V869GRN Greenland 1992 | JN258504 | 1992 | Greenland | Fox     | Holsteinsborg         | 500 | [18] |
| JN258505 92V870GRN Greenland 1992 | JN258505 | 1992 | Greenland | -       | -                     | 500 | [18] |
| JN258506 93V871GRN Greenland 1993 | JN258506 | 1993 | Greenland | Dog     | Holsteinsborg         | 500 | [18] |
| JN258507 93V872GRN Greenland 1993 | JN258507 | 1993 | Greenland | -       | -                     | 500 | [18] |
| JN258508 94V873GRN Greenland 1994 | JN258508 | 1994 | Greenland | Sheep   | Julianehab            | 500 | [18] |
| JN258509 94V876GRN Greenland 1994 | JN258509 | 1994 | Greenland | -       | -                     | 500 | [18] |
| JN258510 95V880GRN Greenland 1995 | JN258510 | 1995 | Greenland | Fox     | Station Nord          | 500 | [18] |
| JN258511 97V881GRN Greenland 1997 | JN258511 | 1997 | Greenland | Sheep   | Julianehab            | 500 | [18] |
| JN258512 00V882GRN Greenland 2000 | JN258512 | 2000 | Greenland | Fox     | Frederikshab          | 500 | [18] |
| JN258513 00V883GRN Greenland 2000 | JN258513 | 2000 | Greenland | Fox     | Christianshab         | 500 | [18] |
| JN258514 01V884GRN Greenland 2001 | JN258514 | 2001 | Greenland | Fox     | Nanortalik            | 500 | [18] |
| JN258515 01V886GRN Greenland 2001 | JN258515 | 2001 | Greenland | Fox     | Sukkertoppen          | 500 | [18] |
| JN258516 01V887GRN Greenland 2001 | JN258516 | 2001 | Greenland | Fox     | Christianshab         | 500 | [18] |
| JN258517 01V888GRN Greenland 2001 | JN258517 | 2001 | Greenland | Fox     | Nuuk                  | 500 | [18] |
| JN258518 01V891GRN Greenland 2001 | JN258518 | 2001 | Greenland | -       | -                     | 440 | [18] |
| JN258519 01V893GRN Greenland 2001 | JN258519 | 2001 | Greenland | Fox     | -                     | 500 | [18] |
| JN258520 02V895GRN Greenland 2002 | JN258520 | 2002 | Greenland | Fox     | Nuuk                  | 500 | [18] |
| JN258521 02V897GRN Greenland 2002 | JN258521 | 2002 | Greenland | Fox     | Kangerlussuaq         | 500 | [18] |
| JN258522 02V898GRN Greenland 2002 | JN258522 | 2002 | Greenland | Fox     | Egedesminde           | 500 | [18] |

|                                            |          |      |           |            |         |      |                                   |
|--------------------------------------------|----------|------|-----------|------------|---------|------|-----------------------------------|
| JN258523 02V899GRN Greenland 2002          | JN258523 | 2002 | Greenland | Fox        | Thule   | 500  | [18]                              |
| JN258586 07V1479AL USA 2007                | JN258586 | 2007 | USA       | Red fox    | Alaska  | 1360 | [18]                              |
| JN258587 07V1480AL USA 2007                | JN258587 | 2007 | USA       | Red fox    | Alaska  | 1360 | [18]                              |
| JN258588 07V1481AL USA 2007                | JN258588 | 2007 | USA       | Arctic fox | Alaska  | 1360 | [18]                              |
| JN258589 08V1484AL USA 2008                | JN258589 | 2008 | USA       | Red fox    | Alaska  | 1360 | [18]                              |
| JN258590 08V1485AL USA 2008                | JN258590 | 2008 | USA       | Red fox    | Alaska  | 1360 | [18]                              |
| JN258591 08V1486AL USA 2008                | JN258591 | 2008 | USA       | Red fox    | Alaska  | 1360 | [18]                              |
| JN258592 08V1488AL USA 2008                | JN258592 | 2008 | USA       | Arctic fox | Alaska  | 1360 | [18]                              |
| L20673 91RABN1578 Canada 1991              | L20673   | 1991 | Canada    | Arctic fox | Ontario | 1365 | [62]                              |
| L20674 91RABN2756 Canada 1991              | L20674   | 1991 | Canada    | Arctic fox | Ontario | 1365 | [62]                              |
| L20675 91RABN0783 Canada 1991              | L20675   | 1991 | Canada    | Arctic fox | Ontario | 1365 | [62]                              |
| L20676 90RABN9196 Canada 1990              | L20676   | 1990 | Canada    | Arctic fox | Ontario | 1365 | [62]                              |
| U03768 Ontario Type 5 - 8480FX Canada 1993 | U03768   | 1993 | Canada    | Red fox    | Ontario | 1367 | [63]                              |
| U03769 Arctic A1 - 1090DG Canada 1993      | U03769   | 1993 | Canada    | Dog        | -       | 1367 | [63]                              |
| U03770 Hudson Bay - 4055DG Canada 1992     | U03770   | 1992 | Canada    | Dog        | -       | 1367 | [63]                              |
| U11734 1991 fox 6199 Canada 1991           | U11734   | 1991 | Canada    | Red fox    | Ontario | 1455 | (Nadin-Davis et al., unpublished) |
| U11735 1993 fox 2244 Canada 1993           | U11735   | 1993 | Canada    | Red fox    | Ontario | 1455 | (Nadin-Davis et al., unpublished) |
| U22654 8684GRO Greenland 1981              | U22654   | 1981 | Greenland | Arctic fox | -       | 1350 | [15]                              |
| U22655 9105CAN Canada 1990                 | U22655   | 1990 | Canada    | Red fox    | Ontario | 1350 | [15]                              |
